# Supplementary material for: Guaiacol as a drug candidate for treating adult polyglucosan body disease
Source: JCI journal article supplement (doi:10.1172/jci.insight.99694), 2018-09-05
Supplement: sd2 [file 2]

**Table 1. Irwin test methodology and and scores.**

| <b>Physical factors and gross appearance</b>          |                                                                                                                                                                                                                                                                                     |
|-------------------------------------------------------|-------------------------------------------------------------------------------------------------------------------------------------------------------------------------------------------------------------------------------------------------------------------------------------|
| Coat color                                            | A= Albino, Ag=Agouti, Bl=Black                                                                                                                                                                                                                                                      |
| Body weight                                           | Animal weight (g) before the test                                                                                                                                                                                                                                                   |
| Presence of whiskers                                  | 0 = None; 1 = A few; 2 = Most, but not a full set; 3 = A full set                                                                                                                                                                                                                   |
| Appearance of fur                                     | 0 = Ungroomed and disheveled; 1 = Somewhat disheveled; 2 = Well-groomed (normal)                                                                                                                                                                                                    |
| Piloerection                                          | 0 = None; 1 = Most hairs standing on end                                                                                                                                                                                                                                            |
| Patches of missing fur on face                        | 0 = None; 1 = Some; 2 = Extensive                                                                                                                                                                                                                                                   |
| Patches of missing fur on body                        | 0 = None; 1 = Some; 2 = Extensive                                                                                                                                                                                                                                                   |
| Wounds                                                | 0 = None; 1 = Signs of previous wounding; 2 = Slight wounds present; 3 = Moderate wounds present; 4 = Extensive wounds present                                                                                                                                                      |
| <b>Observation of behavior in a novel environment</b> |                                                                                                                                                                                                                                                                                     |
| Transfer behavior                                     | 0 = Coma; 1 = Prolonged freeze (>10 sec.), then slight movement; 2 = Extended freeze, then moderate movement; 3 = Brief freeze (a few seconds), then active movement; 4 = Momentary freeze, then swift movement; 5 = No freeze, immediate movement; 6 = Extremely excited ("manic") |
| Body position                                         | 0 = Completely flat (on stomach); 1 = Lying on side; 2 = Lying on back; 3 = Sitting or standing; 4 = Rearing on hind legs; 5 = Repeated vertical leaping                                                                                                                            |
| Spontaneous activity                                  | 0 = None, resting; 1 = Casual scratch, groom, slow movement; 2 = Vigorous scratch, groom, moderate movement; 3 = Vigorous, rapid/dart movement; 4 = Extremely vigorous, rapid/dart movement                                                                                         |
| Respiration rate                                      | 0 = Gasping, irregular; 1 = Slow, shallow; 2 = Normal; 3 = Hyperventilation                                                                                                                                                                                                         |
| Tremor                                                | 0 = None; 1 = Mild; 2 = Marked                                                                                                                                                                                                                                                      |
| Palpebral closure                                     | 0 = Eyes wide open; 1 = Eyes 1/2 closed; 2 = Eyes closed                                                                                                                                                                                                                            |
| Piloerection                                          | 0 = None; 1 = Coat stood on end                                                                                                                                                                                                                                                     |
| Gait                                                  | 0 = Normal; 1 = Fluid but abnormal; 2 = Limited movement only; 3 = Incapacity                                                                                                                                                                                                       |
| Pelvic elevation                                      | 0 = Markedly flattened; 1 = Barely touches; 2 = Normal (3mm elevation); 3 = Elevated (more than 3 mm elevation)                                                                                                                                                                     |
| Tail elevation                                        | 0 = Dragging; 1 = Horizontally extended; 2 = Elevated (Straub tail)                                                                                                                                                                                                                 |
| Urination                                             | 0 = None; 1 = Little; 2 = Moderate amount; 3 = Extensive                                                                                                                                                                                                                            |
| Defecation                                            | Count the number of fecal boli emitted during the 3-min. period                                                                                                                                                                                                                     |
| <b>Reflexes and reactions to simple stimuli</b>       |                                                                                                                                                                                                                                                                                     |
| Touch escape                                          | 0 = No response; 1 = Mild (escape response to firm stroke); 2 = Moderate (rapid response to light stroke); 3 = Vigorous (escape response to approach)                                                                                                                               |
| Positional passivity                                  | 0 = Struggles when restrained by tail; 1 = Struggles when restrained by neck (finger grip, not scruffed); 2 = Struggles                                                                                                                                                             |

|                                                  |                                                                                                                                                                            |
|--------------------------------------------------|----------------------------------------------------------------------------------------------------------------------------------------------------------------------------|
|                                                  | when held supine (on back); 3 = Struggles when restrained by hind legs; 4 = Does not struggle                                                                              |
| Trunk curl                                       | 0 = Absent; 1 = Present                                                                                                                                                    |
| Reaching reflex                                  | 0 = None; 1 = Upon nose contact; 2 = Upon vibrassee contact; 3 = Before vibrassee contact (18mm); 4 = Early vigorous extension (25mm)                                      |
| Body tone                                        | 0 = Flaccid, no return of cavity to normal; 1 = Slight resistance; 2 = Extreme resistance, board like                                                                      |
| <b>Measures recorded during supine restraint</b> |                                                                                                                                                                            |
| Plantar surface skin color                       | 0 = Blanched; 1 = Pink; 2 = Bright, deep red flush                                                                                                                         |
| Heart Rate                                       | 0 = Slow, bradycardia; 1 = Normal; 2 = Fast, tachycardia                                                                                                                   |
| Limb Tone                                        | 0 = No resistance; 1 = Slight resistance; 2 = Moderate resistance; 3 = Marked resistance; 4 = Extreme resistance                                                           |
| Abdominal Tone                                   | 0 = Flaccid, no return of cavity to normal; 1 = Slight resistance; 2 = Extreme resistance, board like                                                                      |
| Righting Reflex                                  | 0 = No impairment; 1-10 = Number of seconds required to right                                                                                                              |
| Air Righting Reflex                              | 0 = No impairment; 1-10 = Number of seconds required to right                                                                                                              |
| Salivation                                       | 0 = None; 1 = Slight margin of sub-maxillary area; 2 = Wet zone entire sub-maxillary area                                                                                  |
| Provoked Biting                                  | 0 = Absent; 1 = Present                                                                                                                                                    |
| <b>Motor coordination</b>                        |                                                                                                                                                                            |
| Grip strength                                    | 0 = None; 1 = Slight grip, semi-effective; 2 = Moderate grip, effective; 3 = Active grip, effective; 4 = Unusually effective                                               |
| Inverted screen (s)                              | 0-60 = Number of seconds before falling                                                                                                                                    |
| Wire maneuver                                    | 0=Active grip with hindlegs; 1= Difficulty to grasp with hindlegs; 2= Unable to grasp with hindlegs; 3=Unable to lift hindlegs, falls within second; 4= Falls immediately  |
| Wire Hand                                        | 0=Active grip with hindlegs; 1= Difficulty to grasp with hindlegs; 2= Unable to grasp with hindlegs; 3=Unable to lift hindlegs, falls within second; 4= Falls immediately  |
| Pole climb                                       | 0= Climbs down within 30 sec; 1= Turns and climbd up the pole; 2= Turns but then freezes; 3= Does not move within 30 seconds or climbs but not off the pole; 4= Falls off. |

**Table 2. Irwin test 1 hour after Guaiacol treatment.**

|                                                       |                                | <b>CONTROL</b> | <b>GUAIACOL<br/>50mg/kg</b> | <b>GUAIACOL<br/>100 mg/kg</b> | <b>GUAIACOL<br/>200 mg/kg</b> |
|-------------------------------------------------------|--------------------------------|----------------|-----------------------------|-------------------------------|-------------------------------|
| <b>Physical factors and gross appearance</b>          | Coat color                     | A              | A                           | A                             | A                             |
|                                                       | Body weight (g)                | 28,8 ± 0,66    | 33,83 ± 0,81                | 31,03 ± 0,45                  | 32,1 ± 3,12                   |
|                                                       | Presence of whiskers           | 3 ± 0          | 3 ± 0                       | 3 ± 0                         | 3 ± 0                         |
|                                                       | Appearance of fur              | 2 ± 0          | 2 ± 0                       | 2 ± 0                         | 2 ± 0                         |
|                                                       | Patches of missing fur on face | 0 ± 0          | 0 ± 0                       | 0 ± 0                         | 0 ± 0                         |
|                                                       | Patches of missing fur on body | 0 ± 0          | 0 ± 0                       | 0 ± 0                         | 0 ± 0                         |
|                                                       | Wounds                         | 0 ± 0          | 0 ± 0                       | 0 ± 0                         | 0 ± 0                         |
| <b>Observation of behavior in a novel environment</b> | Transfer behavior              | 5 ± 0          | 5 ± 0                       | 5 ± 0                         | 5 ± 0                         |
|                                                       | Body position                  | 3 ± 0          | 3 ± 0                       | 3 ± 0                         | 3 ± 0                         |
|                                                       | Spontaneous activity           | 2 ± 0          | 1,67 ± 0,58                 | 1 ± 0                         | 1,67 ± 0,58                   |
|                                                       | Respiration rate               | 2 ± 0          | 2 ± 0                       | 2 ± 0                         | 2 ± 0                         |
|                                                       | Tremor                         | 0 ± 0          | 0 ± 0                       | 0 ± 0                         | 0 ± 0                         |
|                                                       | Palpebral closure              | 0 ± 0          | 0 ± 0                       | 0 ± 0                         | 0,67 ± 0,58                   |
|                                                       | Piloerection                   | 0 ± 0          | 0 ± 0                       | 0 ± 0                         | 0 ± 0                         |
|                                                       | Gait                           | 0 ± 0          | 0 ± 0                       | 0 ± 0                         | 0 ± 0                         |
|                                                       | Pelvic elevation               | 2 ± 0          | 2 ± 0                       | 2 ± 0                         | 2 ± 0                         |
|                                                       | Tail elevation                 | 1 ± 0          | 1 ± 0                       | 1 ± 0                         | 0,67 ± 0,58                   |
|                                                       | Urination                      | 0,67 ± 0,58    | 0,67 ± 0,58                 | 0,67 ± 0,58                   | 0,67 ± 0,58                   |
|                                                       | Defecation                     | 5 ± 1,73       | 4 ± 1                       | 1 ± 1                         | 2,33 ± 0,58                   |
| <b>Reflexes and reactions to simple stimuli</b>       | Touch escape                   | 2 ± 0          | 2 ± 0                       | 2,67 ± 0,58                   | 2,33 ± 0,58                   |
|                                                       | Positional passivity           | 0,67 ± 0,58    | 0,33 ± 0,58                 | 0,33 ± 0,58                   | 0,33 ± 0,58                   |
|                                                       | Trunk curl                     | 1 ± 0          | 0,67 ± 0,58                 | 1 ± 0                         | 1 ± 0                         |
|                                                       | Reaching reflex                | 3 ± 0          | 3 ± 0                       | 3 ± 0                         | 3 ± 0                         |
|                                                       | Body tone                      | 1 ± 0          | 1 ± 0                       | 1 ± 0                         | 1 ± 0                         |
| <b>Measures recorded during supine restraint</b>      | Skin color                     | 1 ± 0          | 1 ± 0                       | 1 ± 0                         | 1 ± 0                         |
|                                                       | Heart rate                     | 1 ± 0          | 1 ± 0                       | 1 ± 0                         | 0,67 ± 0,58                   |
|                                                       | Limb tone                      | 1 ± 0          | 1 ± 0                       | 1 ± 0                         | 1 ± 0                         |
|                                                       | Abdominal tone                 | 1 ± 0          | 1 ± 0                       | 1 ± 0                         | 1 ± 0                         |
|                                                       | Righting reflex                | 0,33 ± 0,58    | 0 ± 0                       | 1,33 ± 0,58                   | 0 ± 0                         |
|                                                       | Air righting reflex            | 0,33 ± 0,58    | 0,33 ± 0,58                 | 1,33 ± 0,58                   | 0,33 ± 0,58                   |
|                                                       | Salivation                     | 0 ± 0          | 0 ± 0                       | 0 ± 0                         | 0 ± 0                         |
|                                                       | Provoked biting                | 1 ± 0          | 0,67 ± 0,58                 | 1 ± 0                         | 1 ± 0                         |
| <b>Grip strength and motor coordination</b>           | Grip strength                  | 3 ± 0          | 3 ± 0                       | 3 ± 0                         | 3 ± 0                         |
|                                                       | Wire maneuver                  | 0 ± 0          | 1 ± 1                       | 0,67 ± 0,58                   | 1 ± 0                         |
|                                                       | Wire hang                      | 0 ± 0          | 0,67 ± 1,15                 | 0,67 ± 0,58                   | 1 ± 0                         |
|                                                       | Inverted screen                | 60 ± 0         | 46,67 ± 23,09               | 60 ± 0                        | 60 ± 0                        |
|                                                       | Pole climb                     | 0 ± 0          | 0 ± 0                       | 0 ± 0                         | 0 ± 0                         |

**Table 3. Irwin test 4 hours after Guaiacol treatment.**

|                                                           |                                | <b>GUAIACOL<br/>50mg/kg</b> | <b>GUAIACOL<br/>100 mg/kg</b> | <b>GUAIACOL<br/>200 mg/kg</b> |
|-----------------------------------------------------------|--------------------------------|-----------------------------|-------------------------------|-------------------------------|
| <b>Physical factors and<br/>gross appearance</b>          | Coat color                     | A                           | A                             | A                             |
|                                                           | Body weight (g)                | 33,07 ± 0,68                | 30,63 ± 0,15                  | 31,8 ± 3,21                   |
|                                                           | Presence of whiskers           | 3 ± 0                       | 3 ± 0                         | 3 ± 0                         |
|                                                           | Appearance of fur              | 2 ± 0                       | 2 ± 0                         | 2 ± 0                         |
|                                                           | Patches of missing fur on face | 0 ± 0                       | 0 ± 0                         | 0 ± 0                         |
|                                                           | Patches of missing fur on body | 0 ± 0                       | 0 ± 0                         | 0 ± 0                         |
|                                                           | Wounds                         | 0 ± 0                       | 0 ± 0                         | 0 ± 0                         |
| <b>Observation of behavior in a novel<br/>environment</b> | Transfer behavior              | 5 ± 0                       | 4,67 ± 0,58                   | 4,67 ± 0,58                   |
|                                                           | Body position                  | 3 ± 0                       | 3 ± 0                         | 3 ± 0                         |
|                                                           | Spontaneous activity           | 1 ± 0                       | 1 ± 0                         | 1 ± 0                         |
|                                                           | Respiration rate               | 2 ± 0                       | 2 ± 0                         | 2 ± 0                         |
|                                                           | Tremor                         | 0 ± 0                       | 0 ± 0                         | 0 ± 0                         |
|                                                           | Palpebral closure              | 0 ± 0                       | 0,33 ± 0,58                   | 0 ± 0                         |
|                                                           | Piloerection                   | 0 ± 0                       | 0 ± 0                         | 0 ± 0                         |
|                                                           | Gait                           | 0 ± 0                       | 0 ± 0                         | 0 ± 0                         |
|                                                           | Pelvic elevation               | 2 ± 0                       | 2 ± 0                         | 0,67 ± 1,15                   |
|                                                           | Tail elevation                 | 1 ± 0                       | 0,67 ± 0,58                   | 1 ± 0                         |
|                                                           | Urination                      | 0,33 ± 0,58                 | 0,33 ± 0,58                   | 0 ± 0                         |
|                                                           | Defecation                     | 3 ± 2                       | 2,33 ± 3,21                   | 1,33 ± 1,53                   |
| <b>Reflexes and<br/>reactions to<br/>simple stimuli</b>   | Touch escape                   | 2 ± 0                       | 2,33 ± 0,58                   | 2,67 ± 0,58                   |
|                                                           | Positional passivity           | 0,33 ± 0,58                 | 0 ± 0                         | 0,33 ± 0,58                   |
|                                                           | Trunk curl                     | 1 ± 0                       | 0,67 ± 0,58                   | 1 ± 0                         |
|                                                           | Reaching reflex                | 3 ± 0                       | 3 ± 0                         | 3 ± 0                         |
|                                                           | Body tone                      | 1 ± 0                       | 1 ± 0                         | 1 ± 0                         |
| <b>Measures recorded during<br/>supine restraint</b>      | Skin color                     | 1 ± 0                       | 1 ± 0                         | 1 ± 0                         |
|                                                           | Heart rate                     | 1 ± 0                       | 1 ± 0                         | 1 ± 0                         |
|                                                           | Limb tone                      | 1 ± 0                       | 1 ± 0                         | 1 ± 0                         |
|                                                           | Abdominal tone                 | 1 ± 0                       | 1 ± 0                         | 1 ± 0                         |
|                                                           | Righting reflex                | 0,67 ± 0,58                 | 1 ± 0                         | 0,33 ± 0,58                   |
|                                                           | Air righting reflex            | 0 ± 0                       | 0 ± 0                         | 0 ± 0                         |
|                                                           | Salivation                     | 0 ± 0                       | 0 ± 0                         | 0 ± 0                         |
| Provoked biting                                           | 0,67 ± 0,58                    | 1 ± 0                       | 0,67 ± 0,58                   |                               |
| <b>Grip strength<br/>and motor<br/>coordination</b>       | Grip strength                  | 3 ± 0                       | 3 ± 0                         | 3 ± 0                         |
|                                                           | Wire maneuver                  | 0,67 ± 0,58                 | 0 ± 0                         | 0 ± 0                         |
|                                                           | Wire hang                      | 0,67 ± 0,58                 | 0 ± 0                         | 0 ± 0                         |
|                                                           | Inverted screen                | 60 ± 0                      | 60 ± 0                        | 60 ± 0                        |
|                                                           | Pole climb                     | 0 ± 0                       | 0 ± 0                         | 0 ± 0                         |
